# Supplementary material
Source: PubMed Central journal article supplement (PMC3137045)
Supplement: supp_M111.251579_jbc.M111.251579-1.pdf [file supp_M111.251579_jbc.M111.251579-1.pdf]

SUPPLEMENTAL FIGURES

Supplemental Figure 1

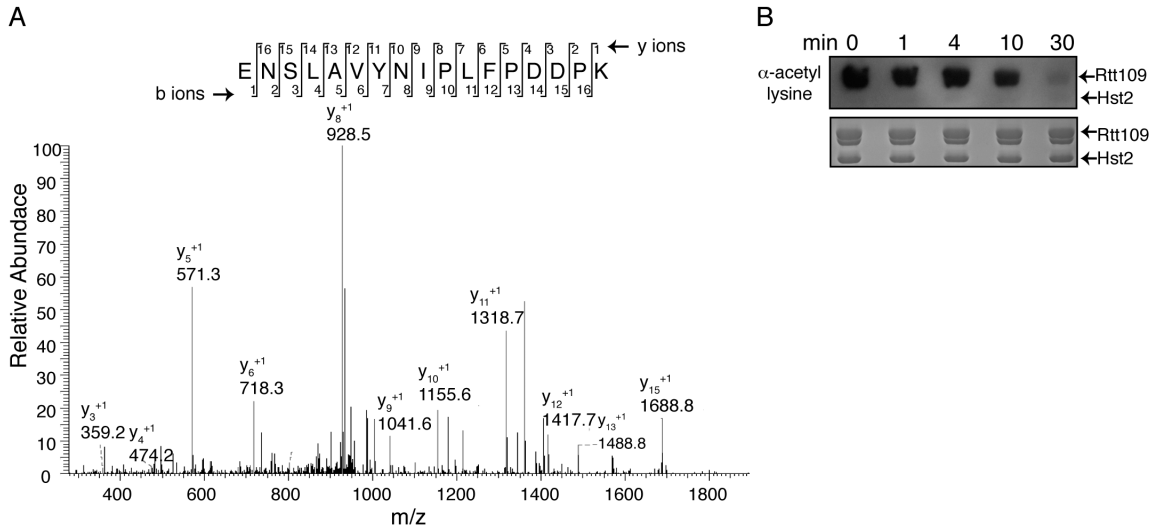

**Fig. S1. Deacetylation of Rtt109 by Hst2.** (A) A representative MS/MS chromatogram depicts deacetylated K290, with singly charged y-series ions labeled (inset: theoretical b and y fragment ions). (B) Acetyl-lysine immunoblots (top) and SDS-PAGE coomassie stained gels (bottom) of the Hst2 (5  $\mu$ M) catalyzed deacetylation of Rtt109 (10  $\mu$ M) reaction at various time points.

Supplemental Figure 2

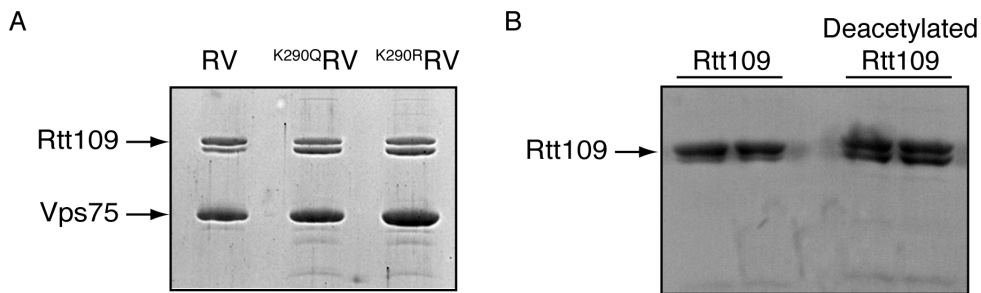

**Fig. S2. SDS-PAGE gel of proteins used in thermal denaturation assays.** (A) Gel of various Rtt109-Vps75 complexes. (B) Gel of Rtt109 and deacetylated Rtt109.

Supplemental Figure 3

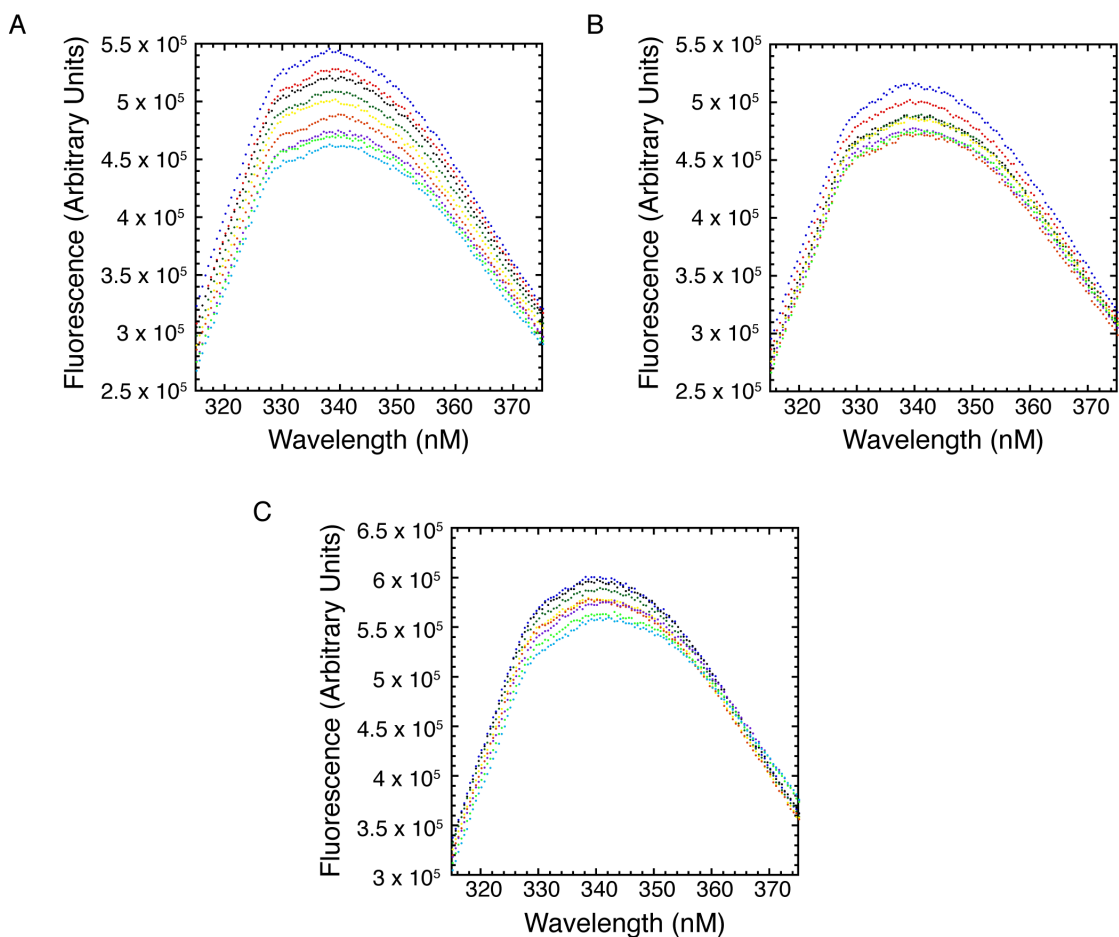

**Fig. S3. Intrinsic protein fluorescence measurements with RV mutants and acetyl-CoA.**

Representative emission spectra of the fluorescence reduction due to acetyl-CoA binding to RV and K290 mutants. (A) **RV**: 0 μM (blue), 0.44 μM (red), 0.89 μM (black), 1.78 μM (green), 3.56 μM (yellow), 7.11 μM (orange), 14.22 μM (purple), 28.44 μM (light green) and 56.90 μM (light blue) of acetyl-CoA was titrated into RV (0.5 μM). (B) **K<sup>290Q</sup>RV**: 0 μM (blue), 14.22 μM (red), 28.44 μM (black), 42.67 μM (green), 56.89 μM (yellow), 85.33 μM (orange), 113.78 μM (purple) and 170.67 μM (light green) of acetyl-CoA was titrated into **K<sup>290Q</sup>RV** (0.5 μM). (C) **K<sup>290R</sup>RV**: 0 μM (blue), 28.44 μM (black), 42.67 μM (green), 56.89 μM (yellow), 85.33 μM (orange), 113.78 μM (purple), 170.67 μM (light green) and 227.56 μM (light blue) of acetyl-CoA was titrated into **K<sup>290R</sup>RV** (0.5 μM).
